# Supplementary figures and images for: Mesoscopic-scale functional networks in the primate amygdala
Source: eLife journal article supplement (doi:10.7554/elife.57341), 2020-09-02

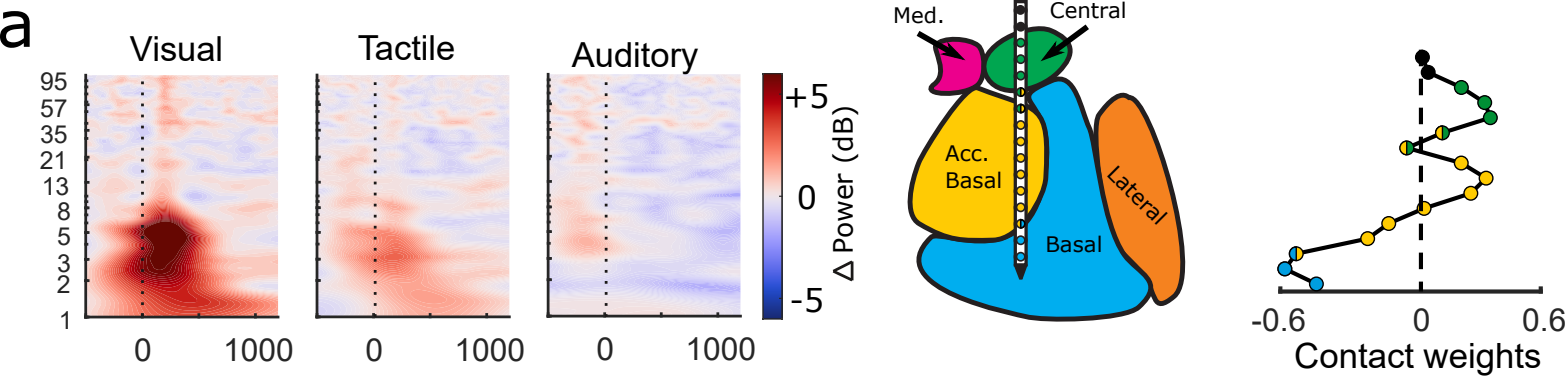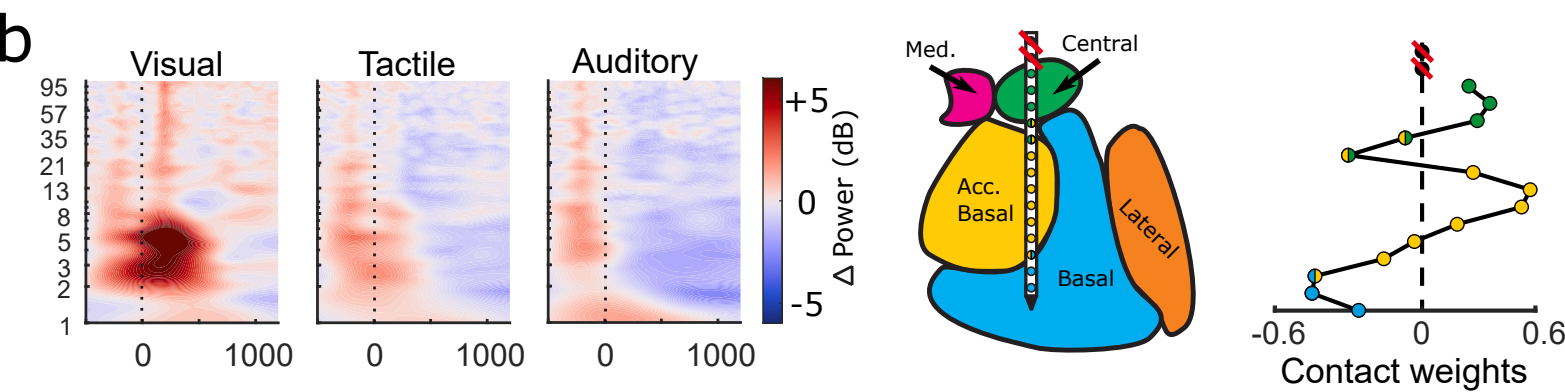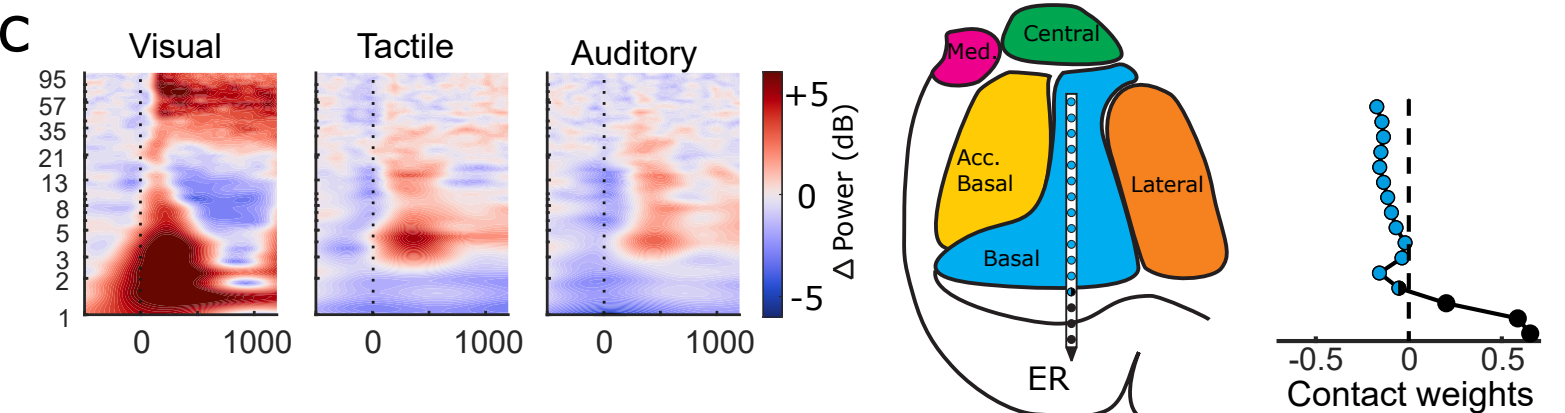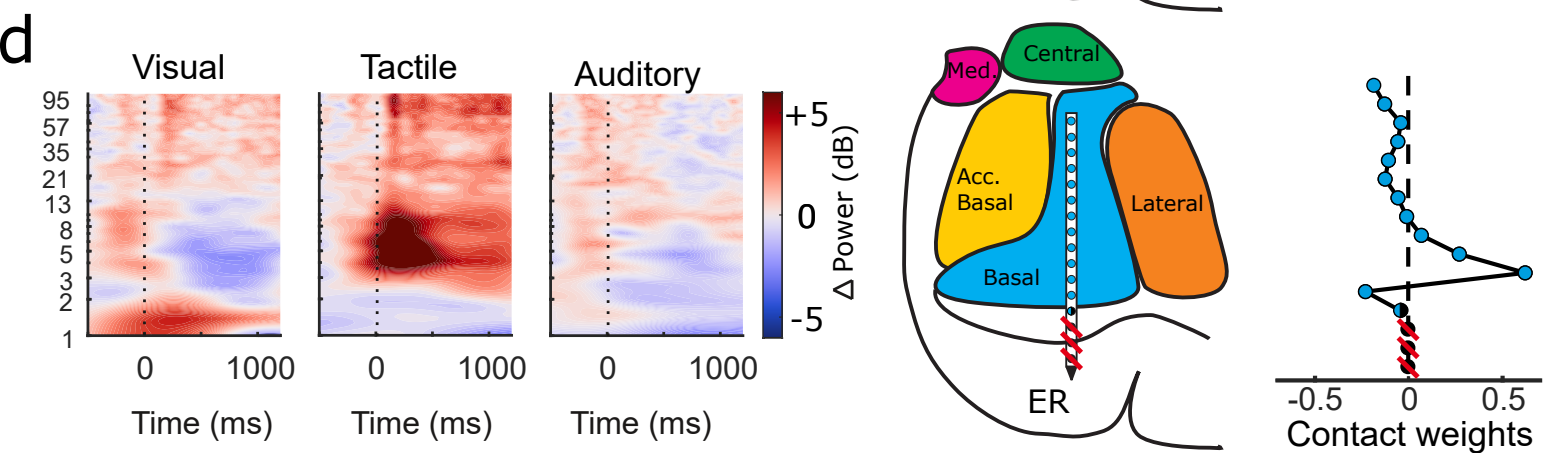

Supplement: supp [file elife-57341-supp-v1.zip]

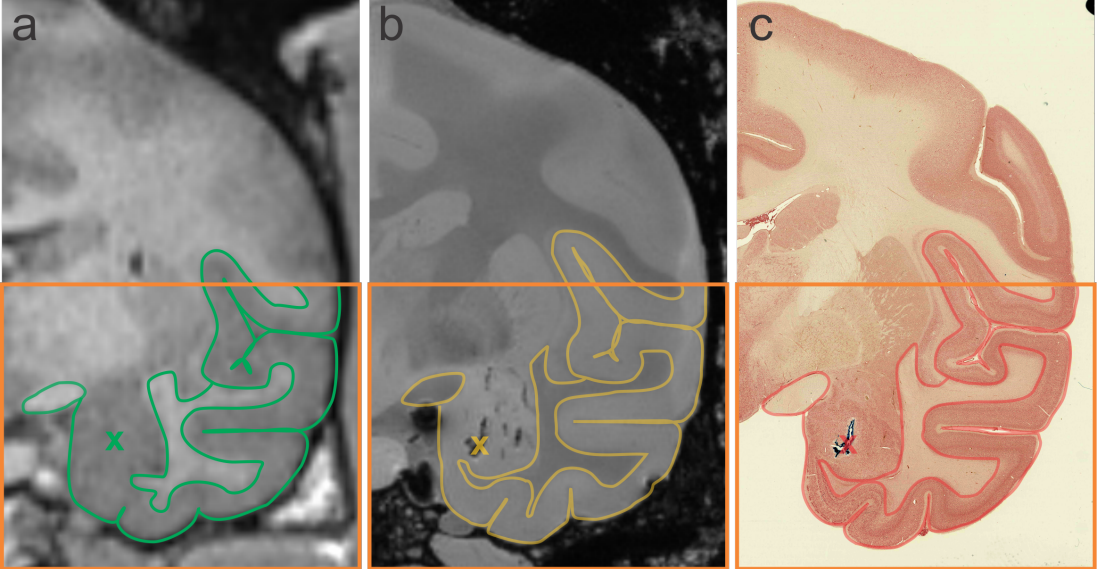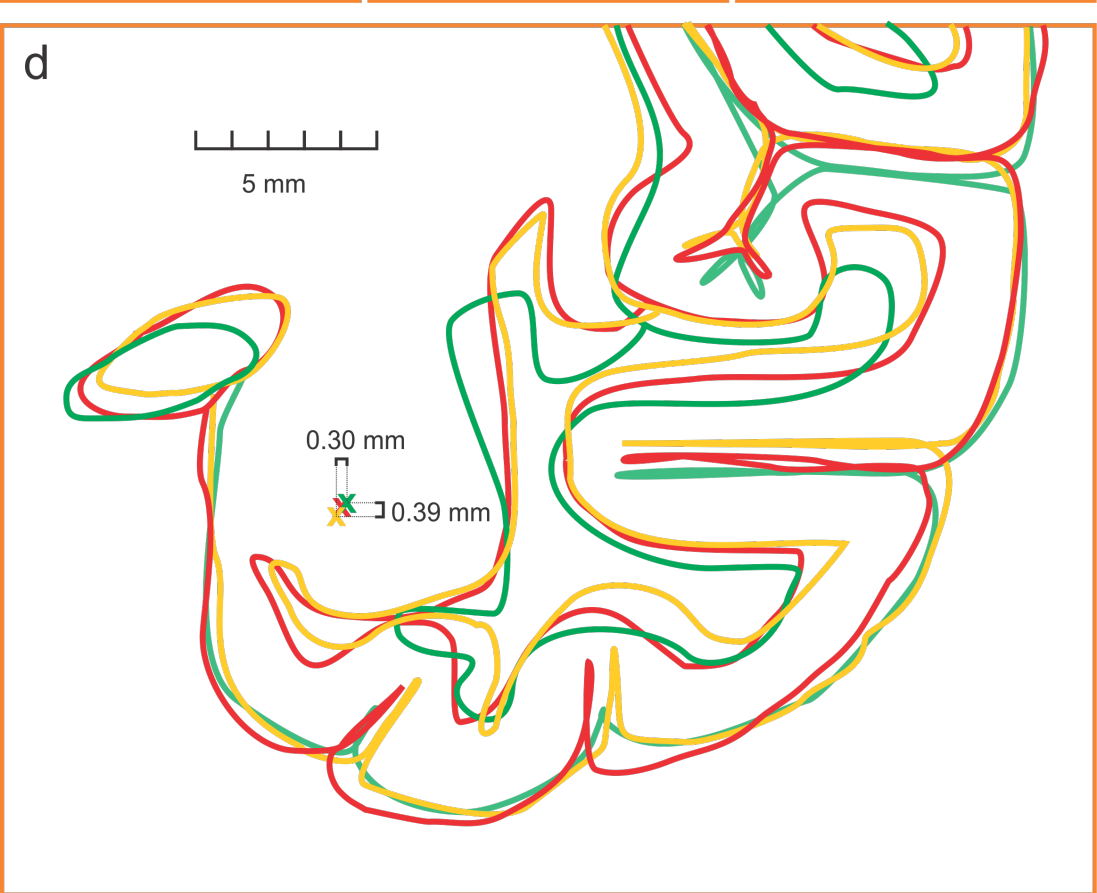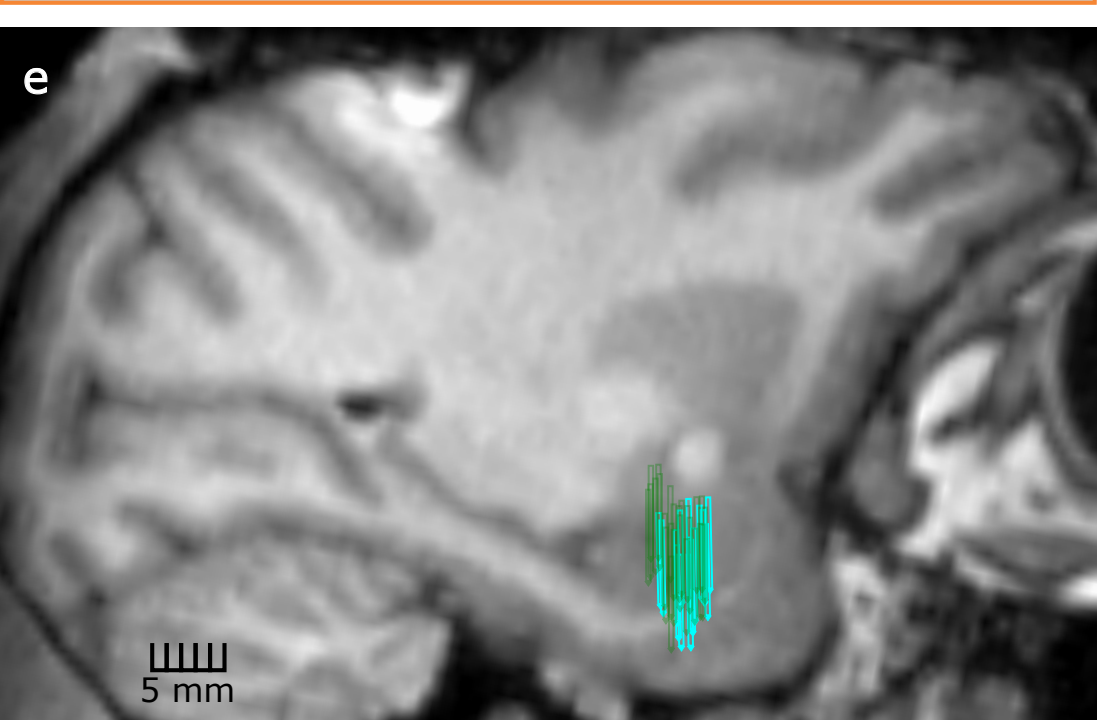

Supplement: supp [file elife-57341-supp-v1.zip]
